# Supplementary material for: Taxonomic classification of metagenomic shotgun sequences with CARMA3
Source: PubMed Central journal article supplement — Nucleic Acids Res. 2011 May 17;39(14):e91. doi: 10.1093/nar/gkr225 (PMC3152360; doi:10.1093/nar/gkr225), 2011-05-17
Supplement: supp_gkr225_supplementary.pdf [file supp_gkr225_supplementary.pdf]

# Supplementary Information

## 1 Simulated Metagenome

| Genome                                          | taxonomy id | # reads |
|-------------------------------------------------|-------------|---------|
| <i>Aliivibrio salmonicida</i> LFI1238           | 316275      | 1205    |
| <i>Bdellovibrio bacteriovorus</i> HD100         | 264462      | 967     |
| <i>Brucella melitensis</i> biovar Abortus 2308  | 359391      | 856     |
| <i>Burkholderia mallei</i> SAVP1                | 320388      | 1297    |
| <i>Burkholderia multivorans</i> ATCC 17616      | 395019      | 1789    |
| <i>Chlamydia trachomatis</i> D/UW-3/CX          | 272561      | 253     |
| <i>Clostridium phytofermentans</i> ISDg         | 357809      | 1276    |
| <i>Colwellia psychrerythraea</i> 34H            | 167879      | 1377    |
| <i>Cyanothece</i> sp. ATCC 51142                | 43989       | 1307    |
| <i>Escherichia coli</i> B str. REL606           | 413997      | 1123    |
| <i>Haemophilus parasuis</i> SH0165              | 557723      | 598     |
| <i>Helicobacter pylori</i> B38                  | 592205      | 404     |
| <i>Mycobacterium abscessus</i> ATCC 19977       | 561007      | 1305    |
| <i>Orientia tsutsugamushi</i> str. Ikeda        | 334380      | 499     |
| <i>Pseudomonas aeruginosa</i> PA7               | 381754      | 1714    |
| <i>Rhodopseudomonas palustris</i> BisB5         | 316057      | 1224    |
| <i>Shigella boydii</i> CDC 3083-94              | 344609      | 1202    |
| <i>Sinorhizobium meliloti</i> 1021              | 266834      | 973     |
| <i>Staphylococcus aureus</i> subsp. aureus Mu50 | 158878      | 736     |
| <i>Staphylococcus epidermidis</i> ATCC 12228    | 176280      | 684     |
| <i>Streptococcus pneumoniae</i> G54             | 512566      | 534     |
| <i>Sulfurovum</i> sp. NBC37-1                   | 387093      | 681     |
| <i>Synechococcus</i> sp. CC9605                 | 110662      | 650     |
| <i>Vibrio cholerae</i> M66-2                    | 579112      | 1020    |
| <i>Vibrio parahaemolyticus</i> RIMD 2210633     | 223926      | 1326    |
| Total                                           |             | 25000   |

Supplementary Table 1: The 25 genomes from NCBI used to simulate the metagenomic reads. The number of reads refers to the simulated metagenome with average read length 265 bp.

## 2 Evaluation of CARMA3 on reads of different lengths

|              | order filtered |      | species filtered |     | all   |    |
|--------------|----------------|------|------------------|-----|-------|----|
|              | TP             | FP   | TP               | FP  | TP    | FP |
| superkingdom | 14190          | 1175 | 21238            | 151 | 23010 | 19 |
| phylum       | 9905           | 1153 | 20034            | 201 | 22919 | 28 |
| class        | 4307           | 1289 | 16723            | 269 | 20826 | 30 |
| order        | –              | 2082 | 15851            | 246 | 21456 | 31 |
| family       | –              | 959  | 11696            | 213 | 18805 | 25 |
| genus        | –              | 151  | 7078             | 452 | 16357 | 99 |
| species      | –              | 2    | –                | 49  | 417   | 17 |

Supplementary Table 2: Reads simulated using the MetaSim 454 error model with 400 bp read length.

|              | order filtered |      | species filtered |     | all   |    |
|--------------|----------------|------|------------------|-----|-------|----|
|              | TP             | FP   | TP               | FP  | TP    | FP |
| superkingdom | 3174           | 174  | 8558             | 39  | 12411 | 14 |
| phylum       | 2208           | 531  | 8107             | 146 | 12218 | 41 |
| class        | 884            | 564  | 6517             | 174 | 10745 | 47 |
| order        | –              | 1114 | 6469             | 251 | 11062 | 76 |
| family       | –              | 665  | 4916             | 299 | 9526  | 73 |
| genus        | –              | 190  | 2854             | 354 | 8597  | 90 |
| species      | –              | 42   | –                | 485 | 2724  | 44 |

Supplementary Table 3: Reads simulated using the MetaSim 454 error model with 80 bp read length.

|              | order filtered |      | species filtered |      | all   |     |
|--------------|----------------|------|------------------|------|-------|-----|
|              | TP             | FP   | TP               | FP   | TP    | FP  |
| superkingdom | 7112           | 335  | 15692            | 34   | 20305 | 6   |
| phylum       | 5139           | 904  | 15012            | 182  | 20157 | 22  |
| class        | 2223           | 1021 | 12483            | 226  | 18331 | 24  |
| order        | –              | 2143 | 12291            | 342  | 18809 | 37  |
| family       | –              | 1320 | 9769             | 439  | 16736 | 38  |
| genus        | –              | 363  | 6420             | 672  | 15759 | 82  |
| species      | –              | 99   | –                | 1190 | 6773  | 114 |

Supplementary Table 4: Reads simulated using the MetaSim Illumina error model with 80 bp read length.

### 3 Overlap of classifications for order-filtered dataset

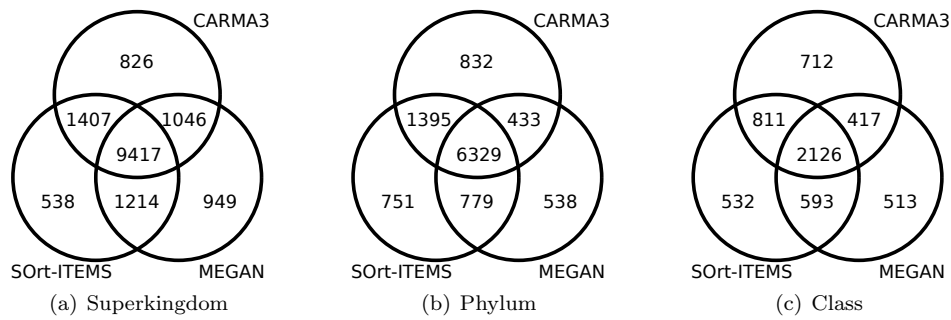

Supplementary Figure 1: True positives overlap of CARMA3, SOrt-ITEMS and MEGAN for the order-filtered dataset at taxonomic ranks superkingdom to class.

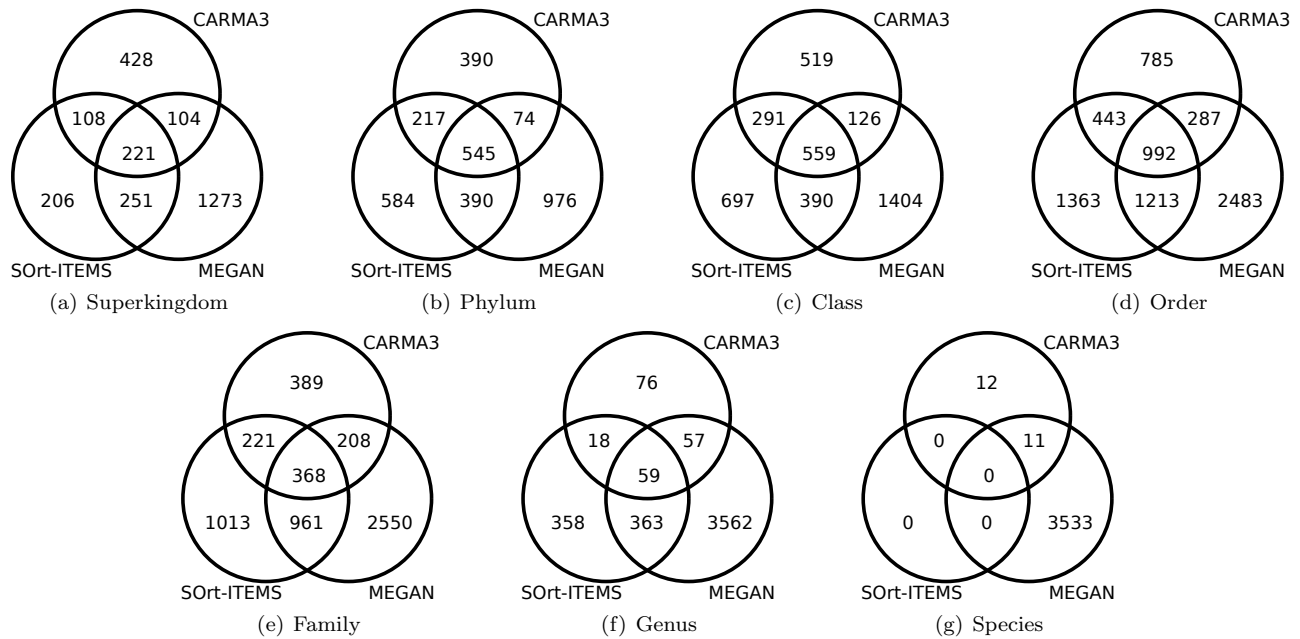

Supplementary Figure 2: False positives overlap of CARMA3, SOrt-ITEMS and MEGAN for the order-filtered dataset at taxonomic ranks superkingdom to species.

## 4 Overlap of classifications for species-filtered dataset

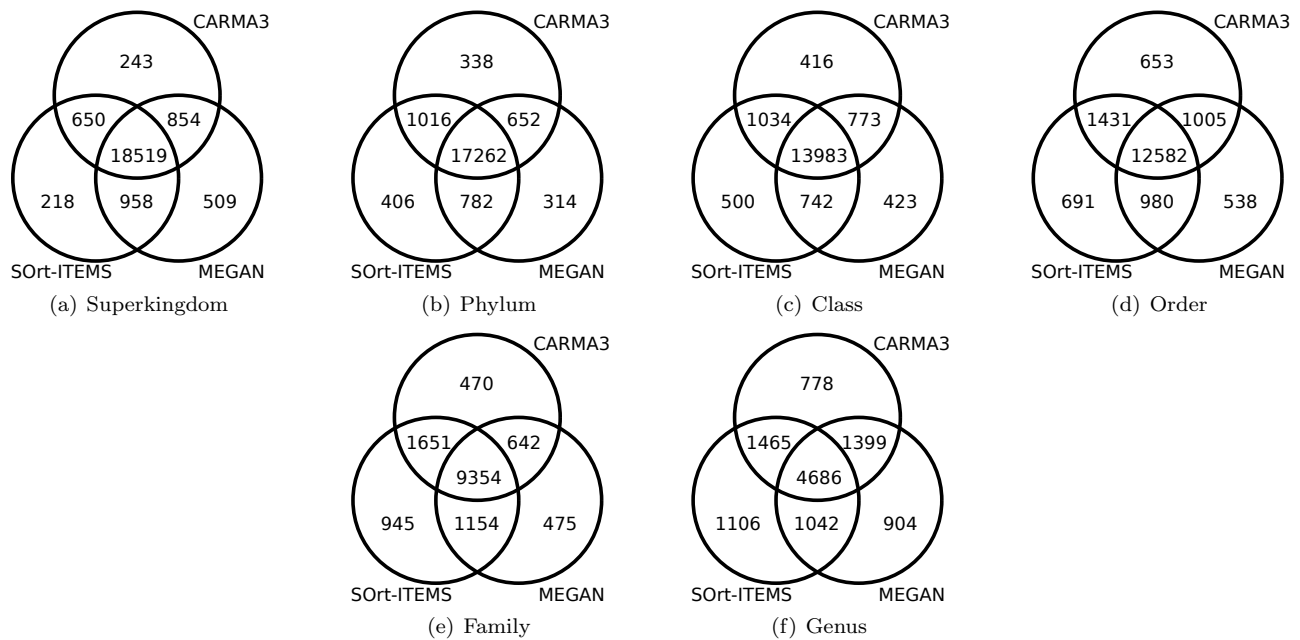

Supplementary Figure 3: True positives overlap of CARMA3, SOrt-ITEMS and MEGAN for the species-filtered dataset at taxonomic ranks superkingdom to genus.

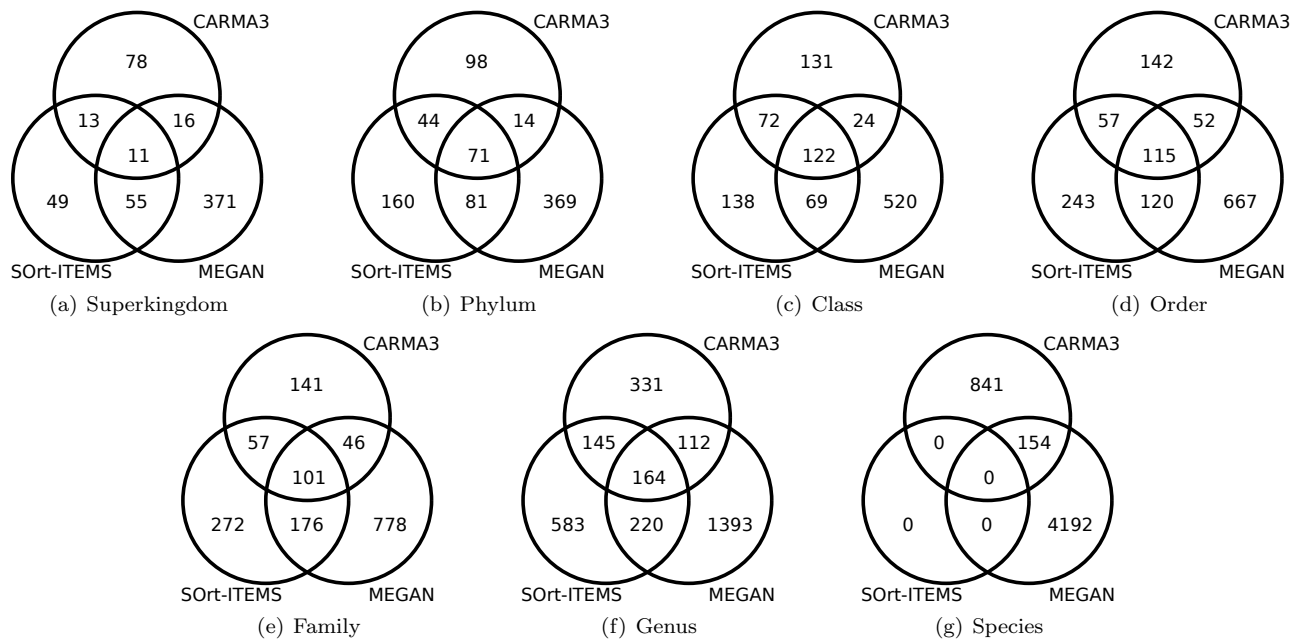

Supplementary Figure 4: False positives overlap of CARMA3, SOrt-ITEMS and MEGAN for the species-filtered dataset at taxonomic ranks superkingdom to species.

## 5 Overlap of classifications for unfiltered dataset

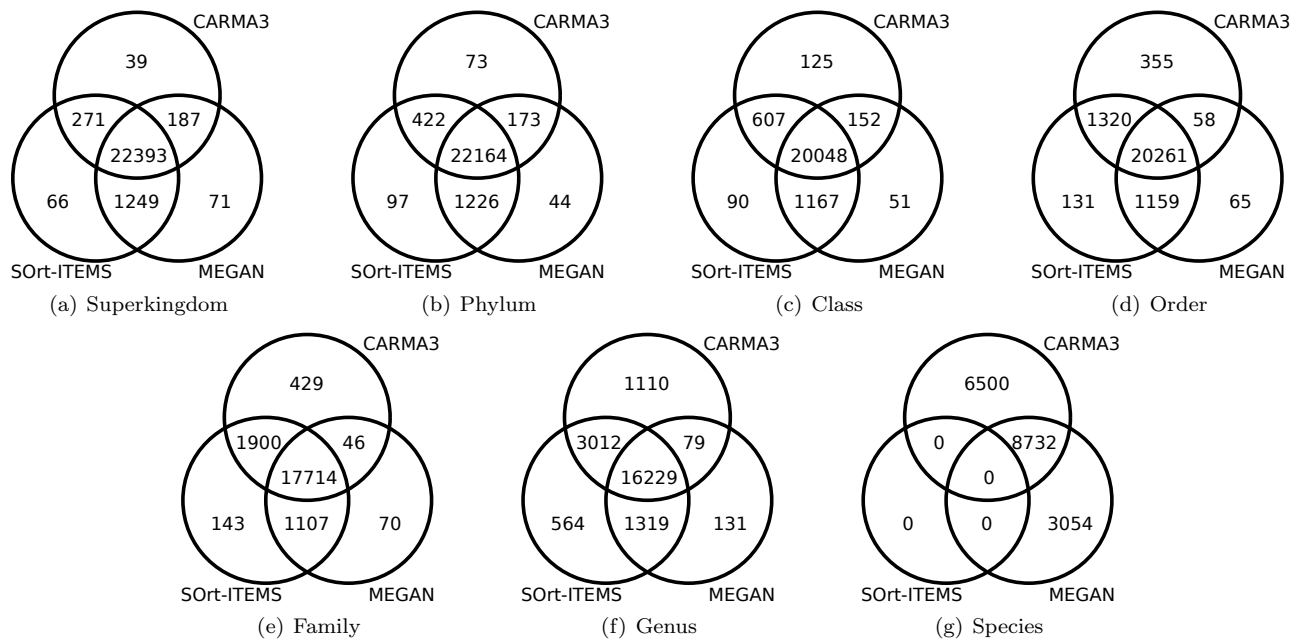

Supplementary Figure 5: True positives overlap of CARMA3, SOrt-ITEMS and MEGAN for the unfiltered dataset at taxonomic ranks superkingdom to species.

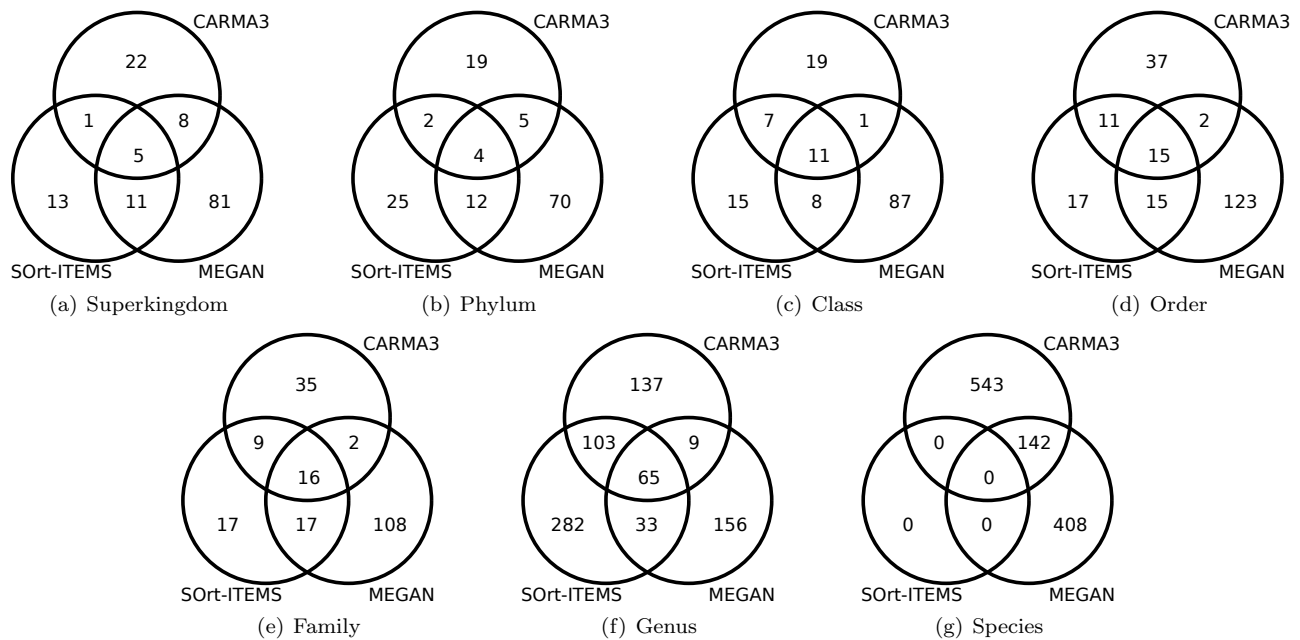

Supplementary Figure 6: False positives overlap of CARMA3, SOrt-ITEMS and MEGAN for the unfiltered dataset at taxonomic ranks superkingdom to species.

## 6 Biogas Plant Microbial Community – Overlap

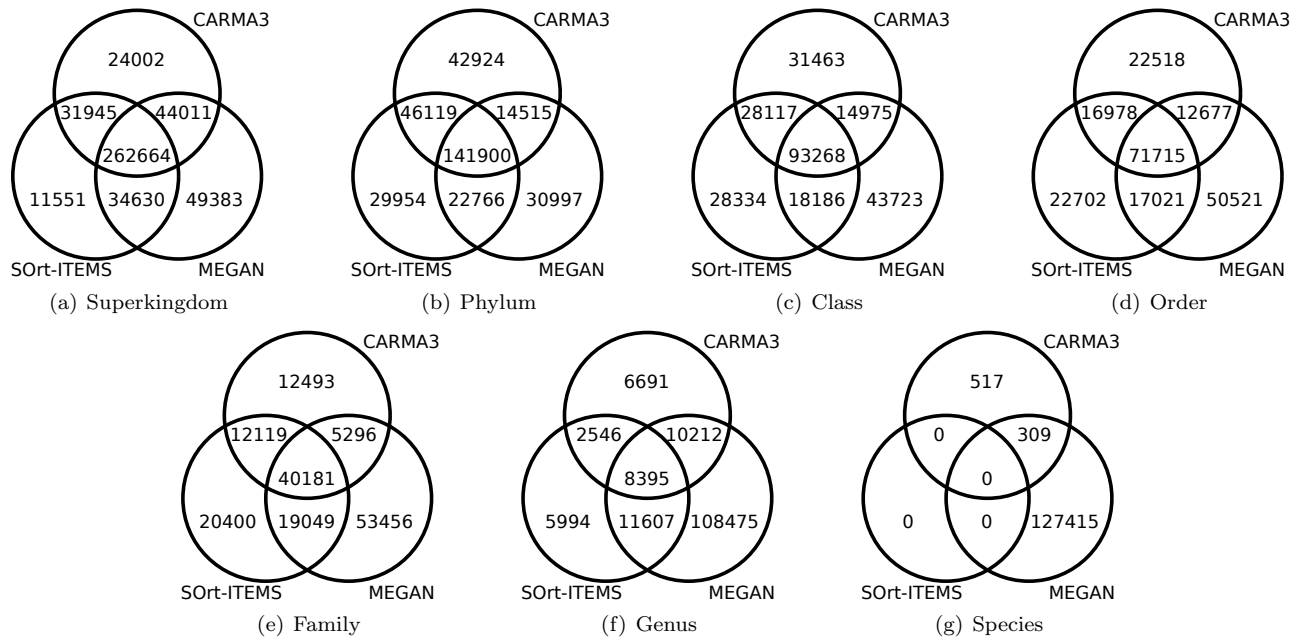

Supplementary Figure 7: Number of reads classified by each method at the corresponding taxonomic rank.

## 7 Biogas Plant Microbial Community – Comparative Taxonomic Profile

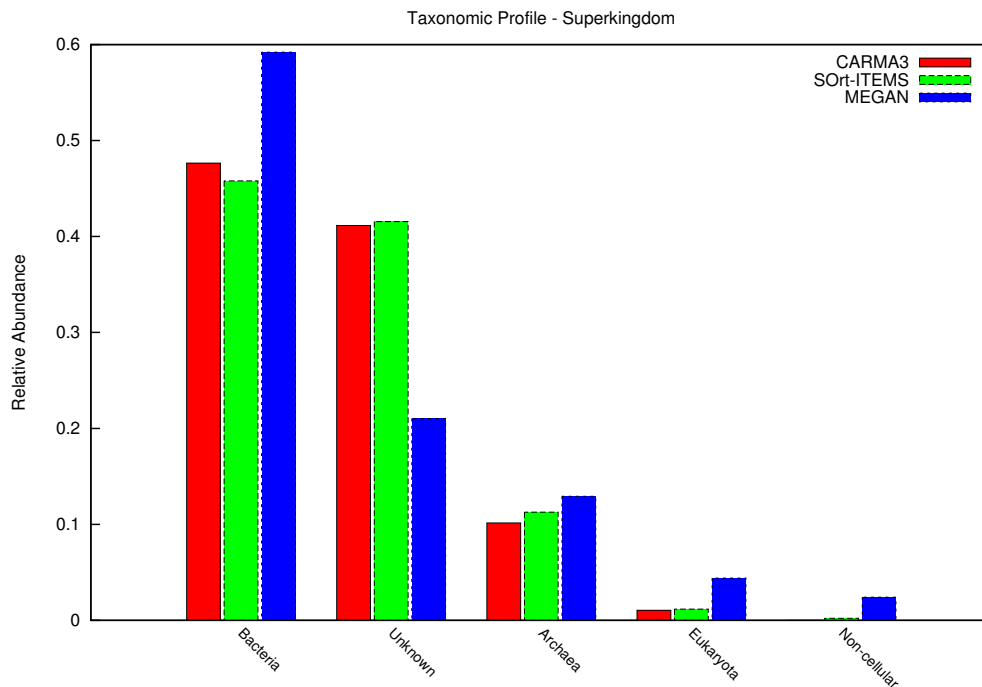

Supplementary Figure 8: Comparative taxonomic profile of a biogas plant microbial community at taxonomic rank superkingdom.

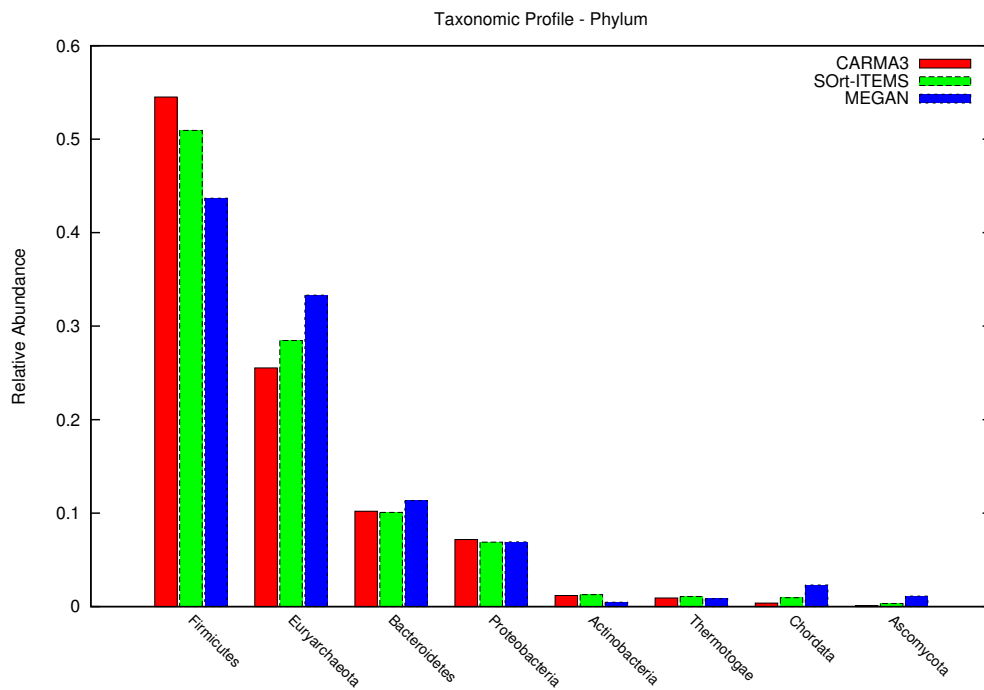

Supplementary Figure 9: Comparative taxonomic profile of a biogas plant microbial community at taxonomic rank phylum.

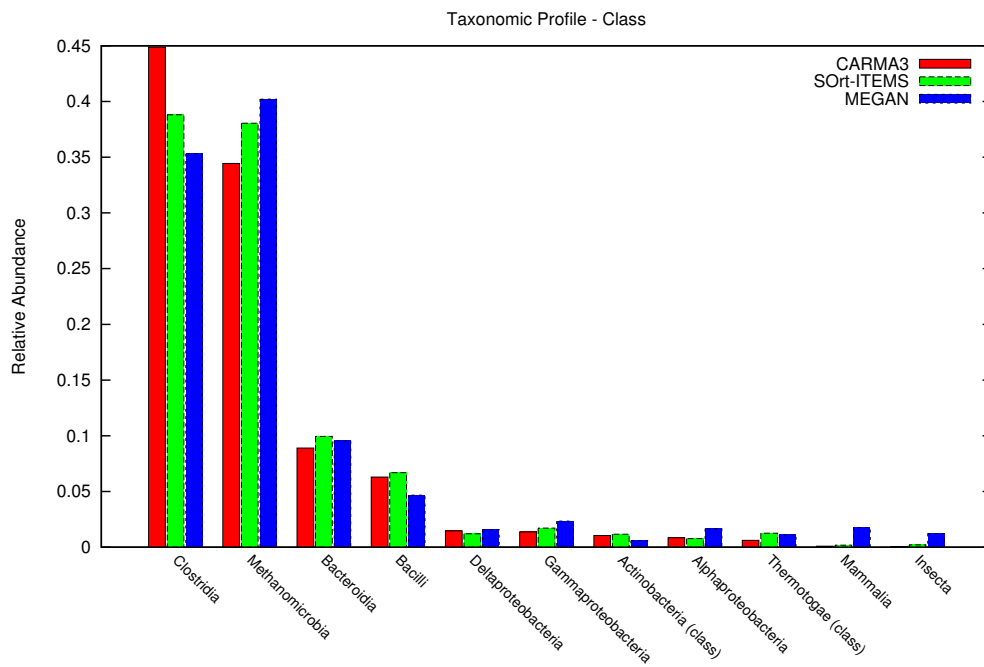

Supplementary Figure 10: Comparative taxonomic profile of a biogas plant microbial community at taxonomic rank class.

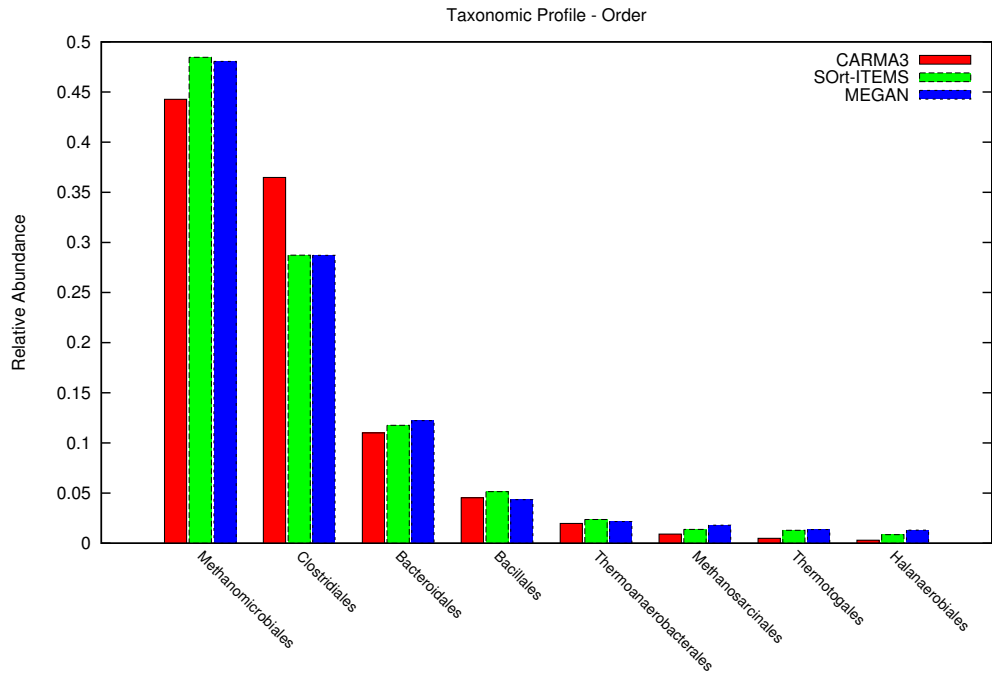

Supplementary Figure 11: Comparative taxonomic profile of a biogas plant microbial community at taxonomic rank order.

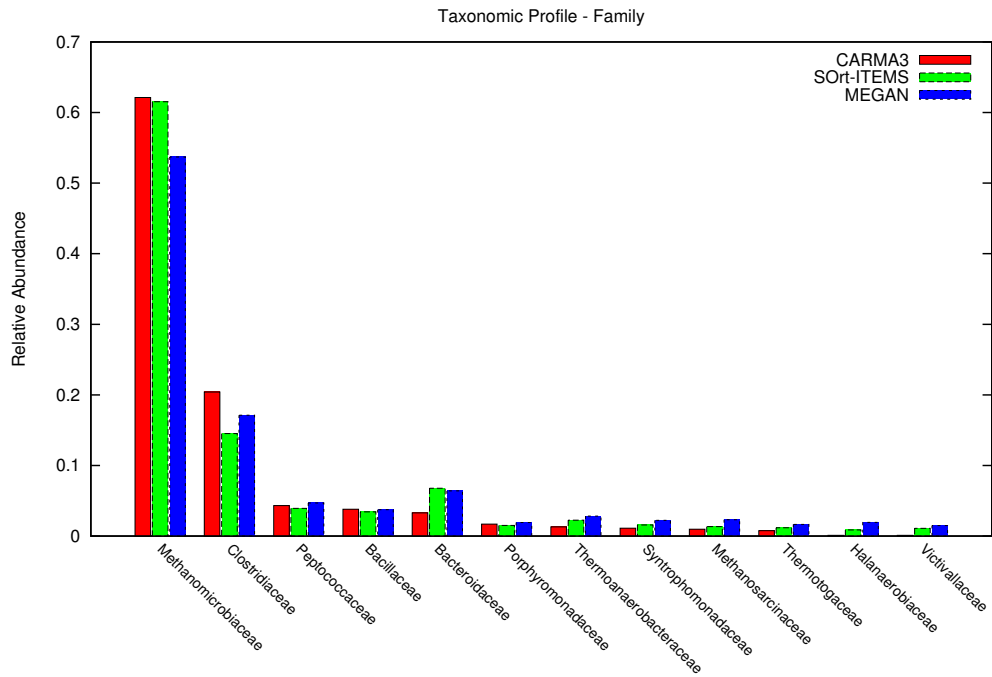

Supplementary Figure 12: Comparative taxonomic profile of a biogas plant microbial community at taxonomic rank family.



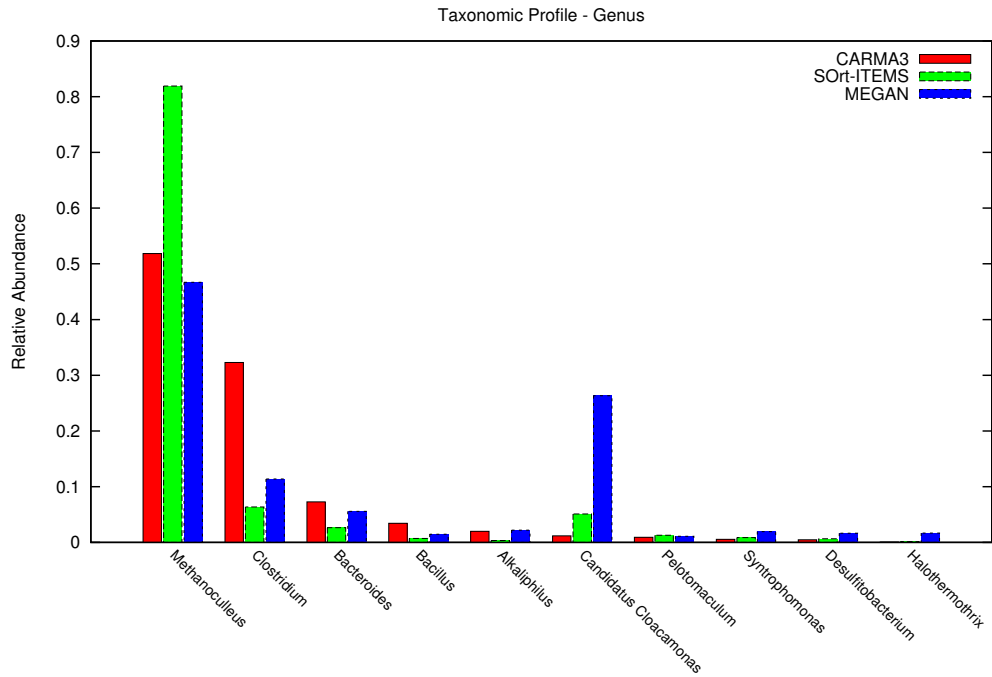

Supplementary Figure 13: Comparative taxonomic profile of a biogas plant microbial community at taxonomic rank genus.

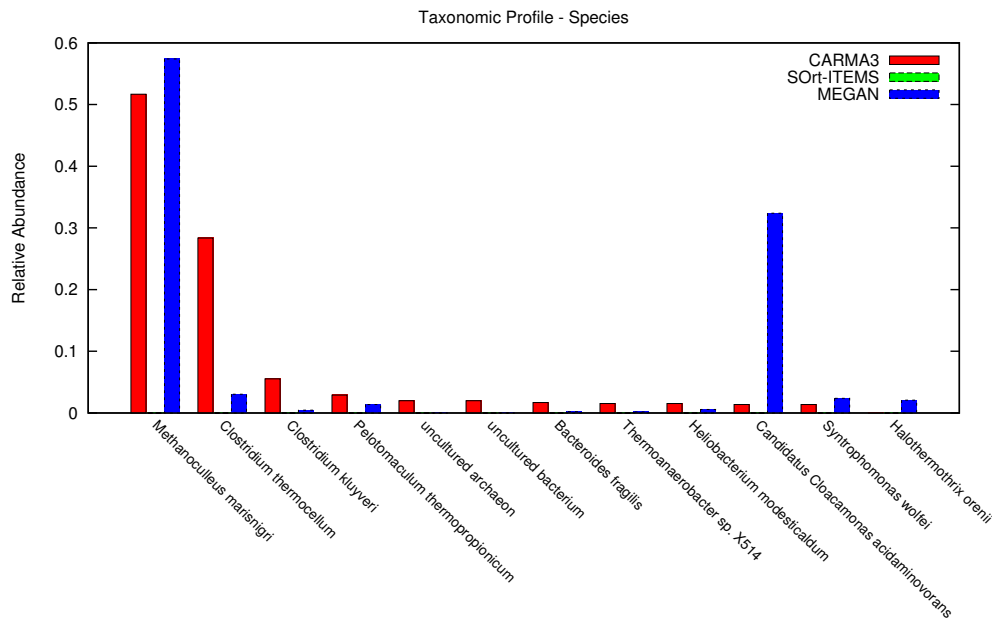

Supplementary Figure 14: Comparative taxonomic profile of a biogas plant microbial community at taxonomic rank species. Note that SOrt-ITEMS does not make predictions at taxonomic rank species.

|              | CARMA3 | SOrt-ITEMS | MEGAN |
|--------------|--------|------------|-------|
| superkingdom | 0      | 0          | 0     |
| phylum       | 0.045  | 0.054      | 0.073 |
| class        | 0.036  | 0.054      | 0.120 |
| order        | 0.065  | 0.106      | 0.277 |
| family       | 0.087  | 0.142      | 0.456 |
| genus        | 0.091  | 0.090      | 0.495 |
| species      | 0.267  | –          | 0.689 |

Supplementary Table 5: Fraction of reads that have been discarded from the comparative taxonomic profile due to the cut-off threshold 0.01.

## 8 Taxonomic profile of the human gut microbial gene catalogue

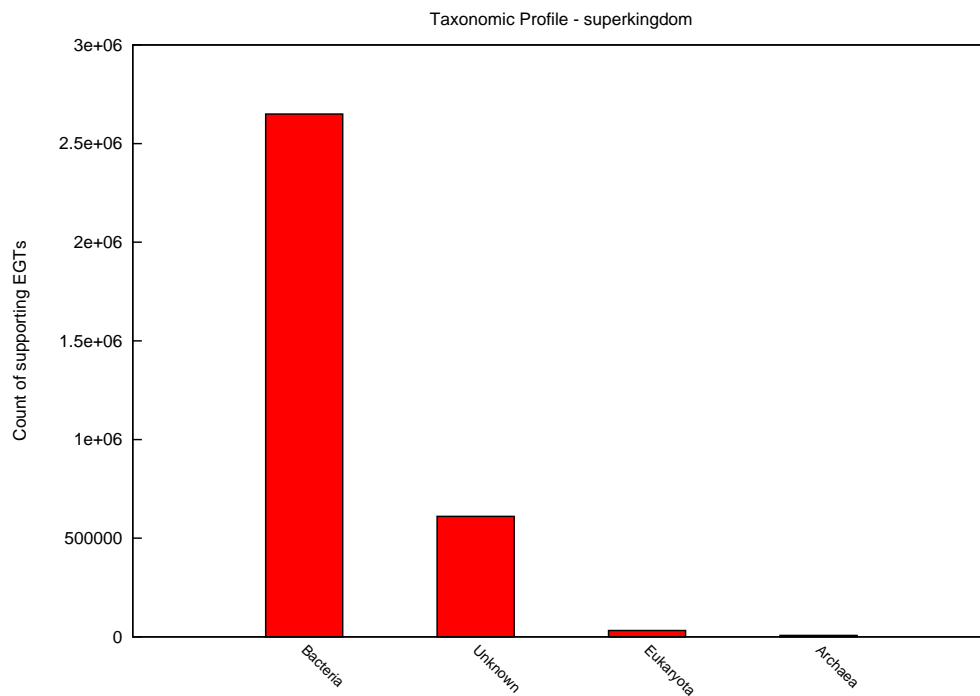

Supplementary Figure 15: All taxa of the human gut microbial gene catalogue at taxonomic rank superkingdom.

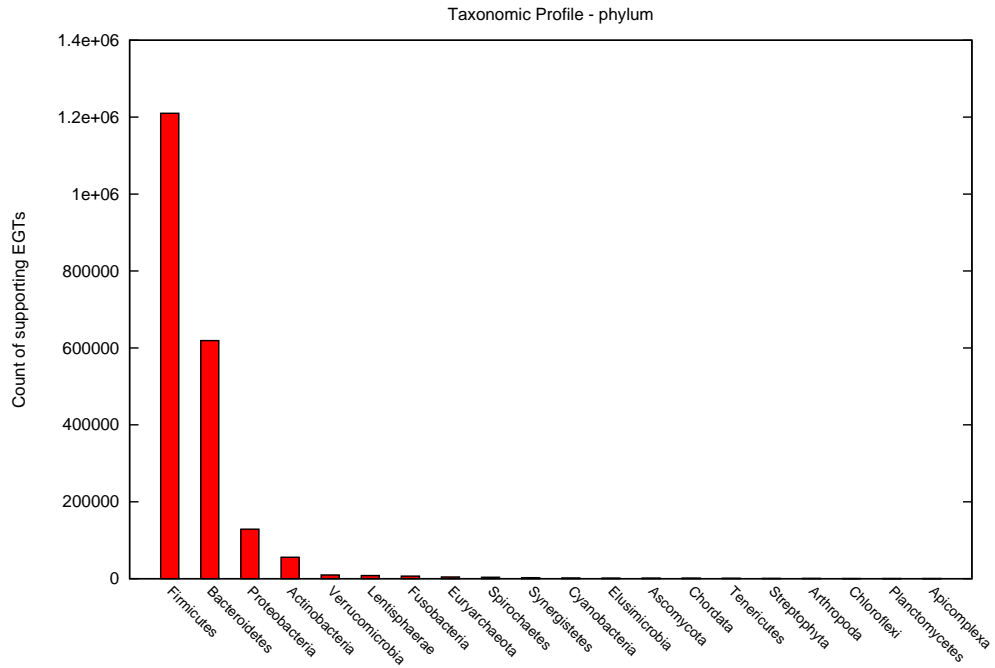

Supplementary Figure 16: The 20 most abundant taxa of the human gut microbial gene catalogue at taxonomic rank phylum.

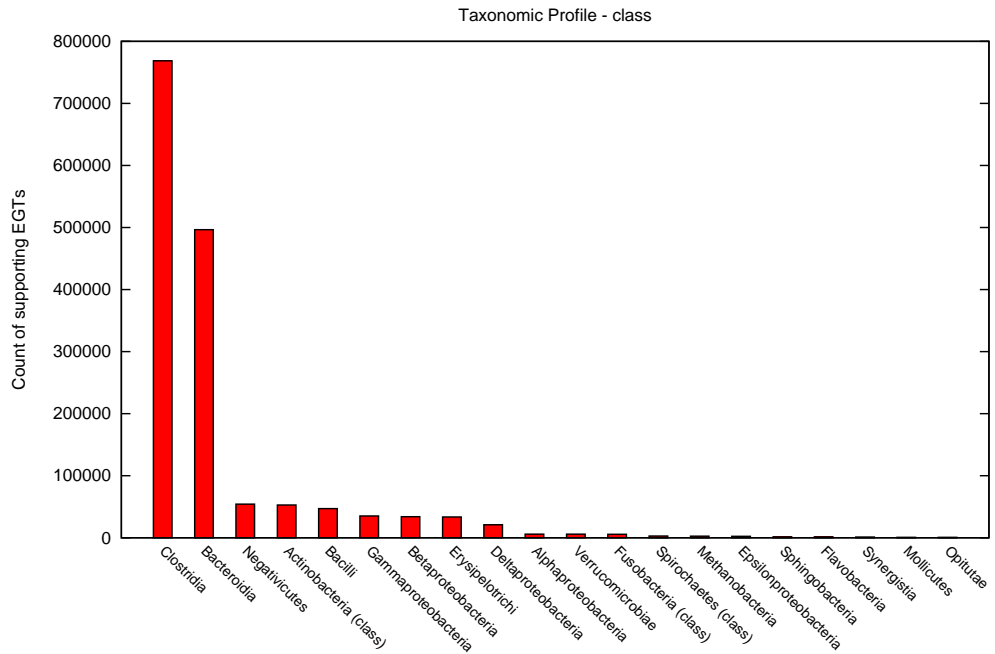

Supplementary Figure 17: The 20 most abundant taxa of the human gut microbial gene catalogue at taxonomic rank class.

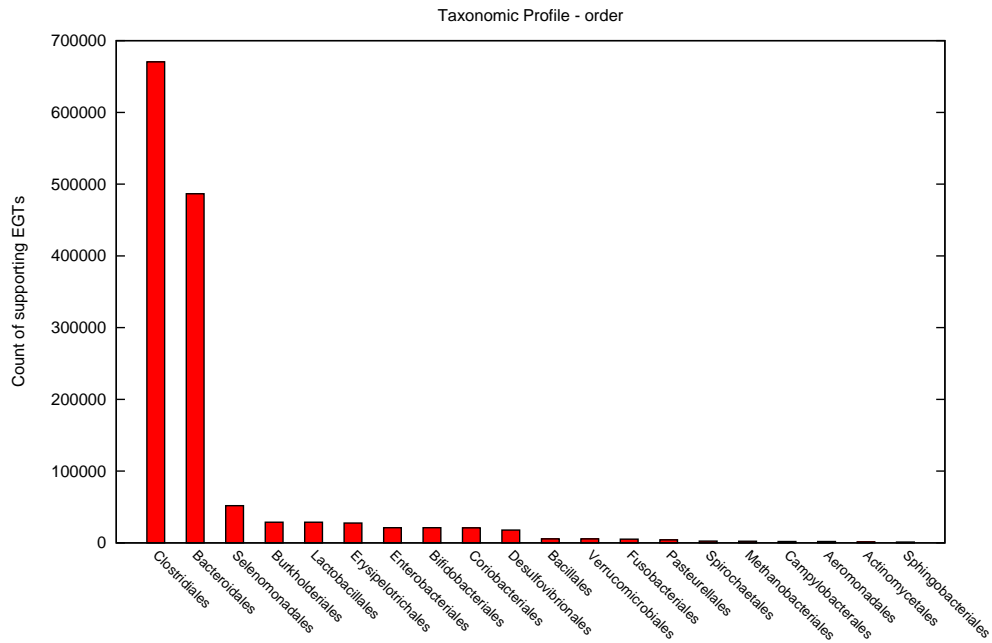

Supplementary Figure 18: The 20 most abundant taxa of the human gut microbial gene catalogue at taxonomic rank order.

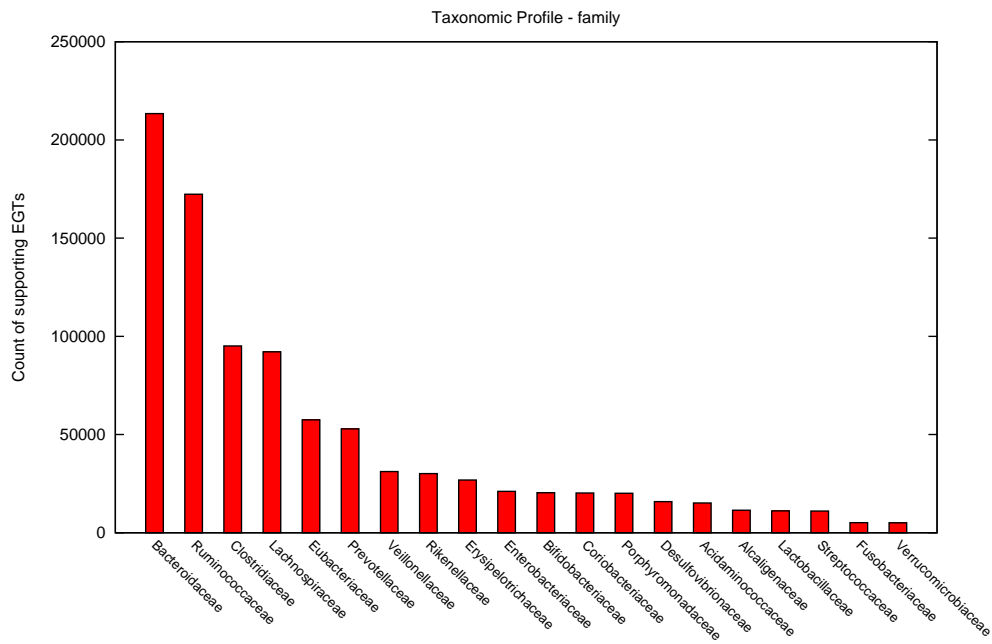

Supplementary Figure 19: The 20 most abundant taxa of the human gut microbial gene catalogue at taxonomic rank family.

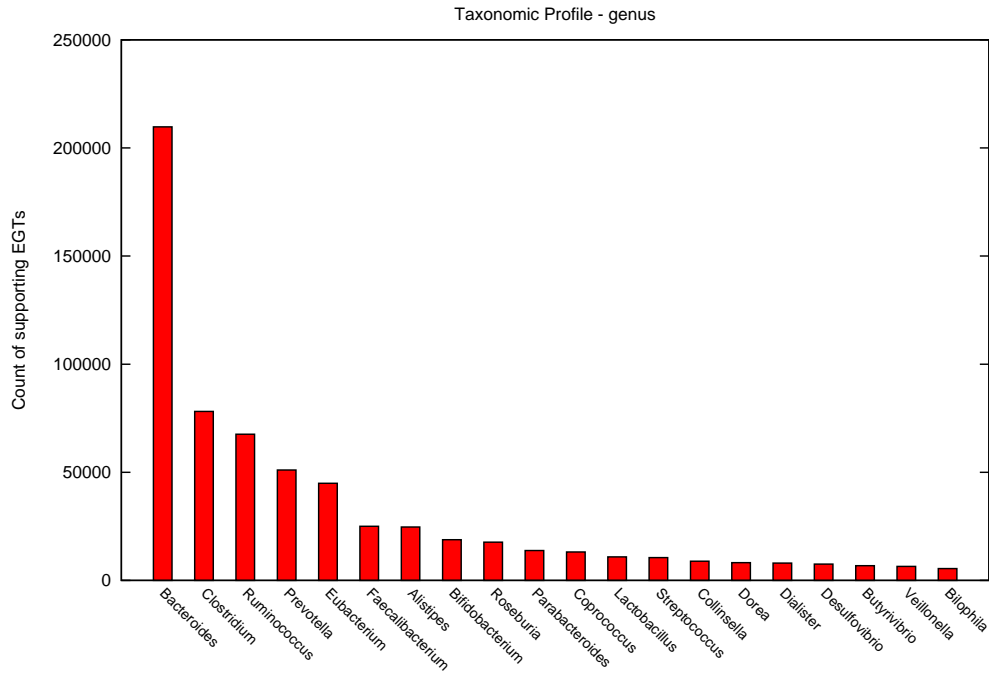

Supplementary Figure 20: The 20 most abundant taxa of the human gut microbial gene catalogue at taxonomic rank genus.

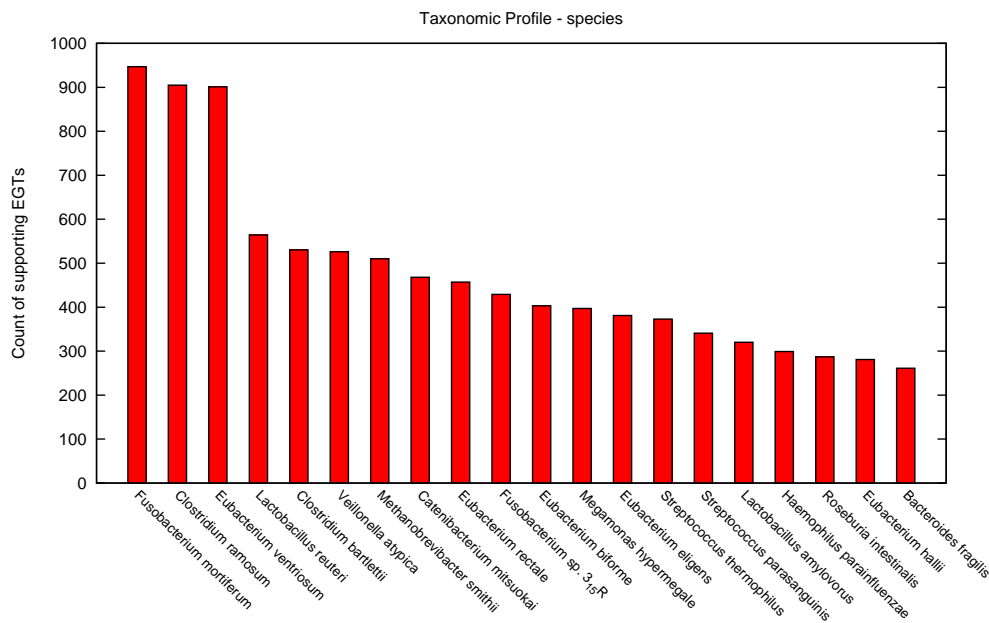

Supplementary Figure 21: The 20 most abundant taxa of the human gut microbial gene catalogue at taxonomic rank species.

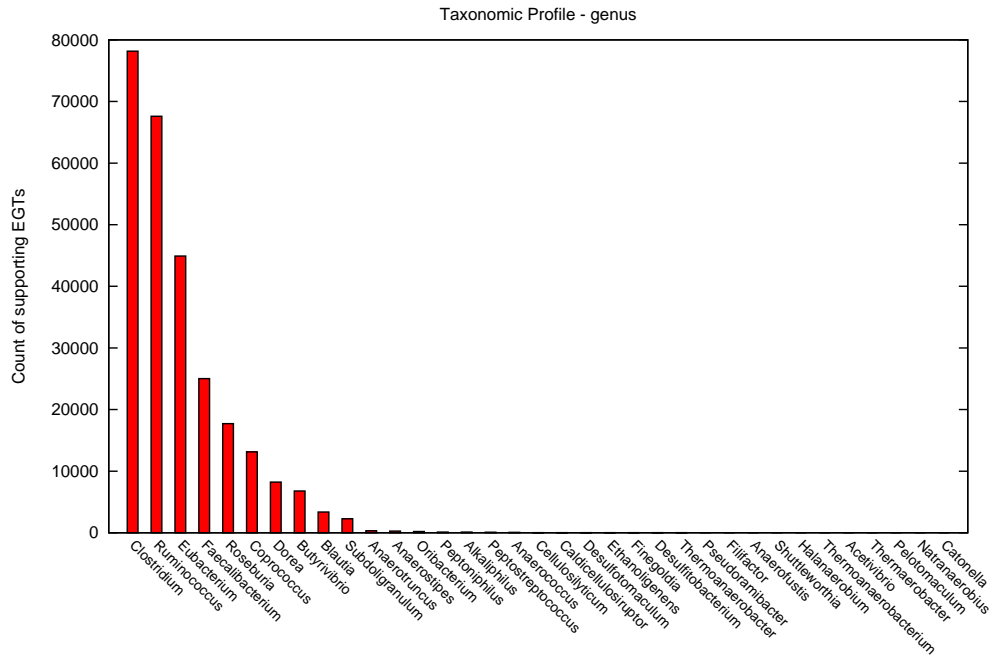

Supplementary Figure 22: All genera from the class *Clostridia* in the human gut microbial gene catalogue.

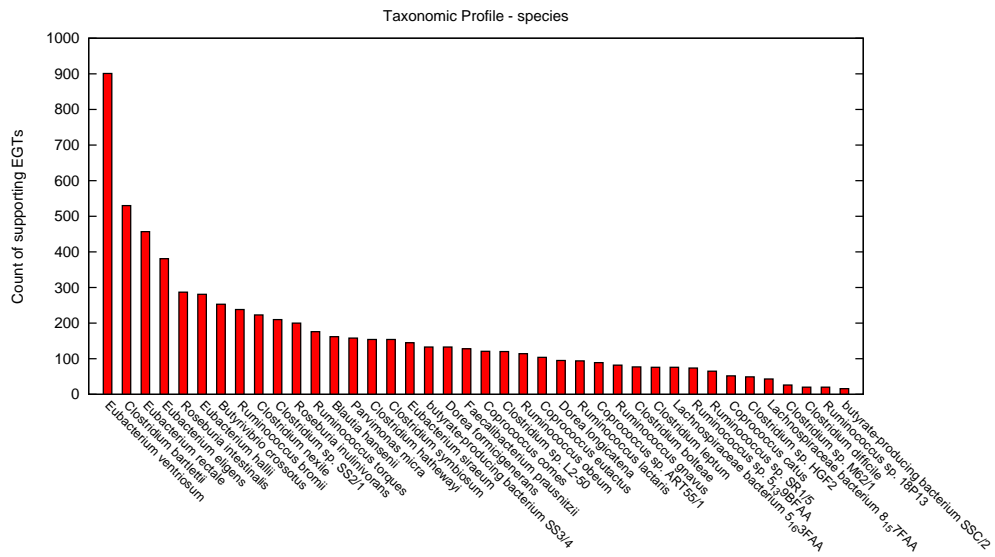

Supplementary Figure 23: The 40 most abundant species from the class *Clostridia* in the human gut microbial gene catalogue.

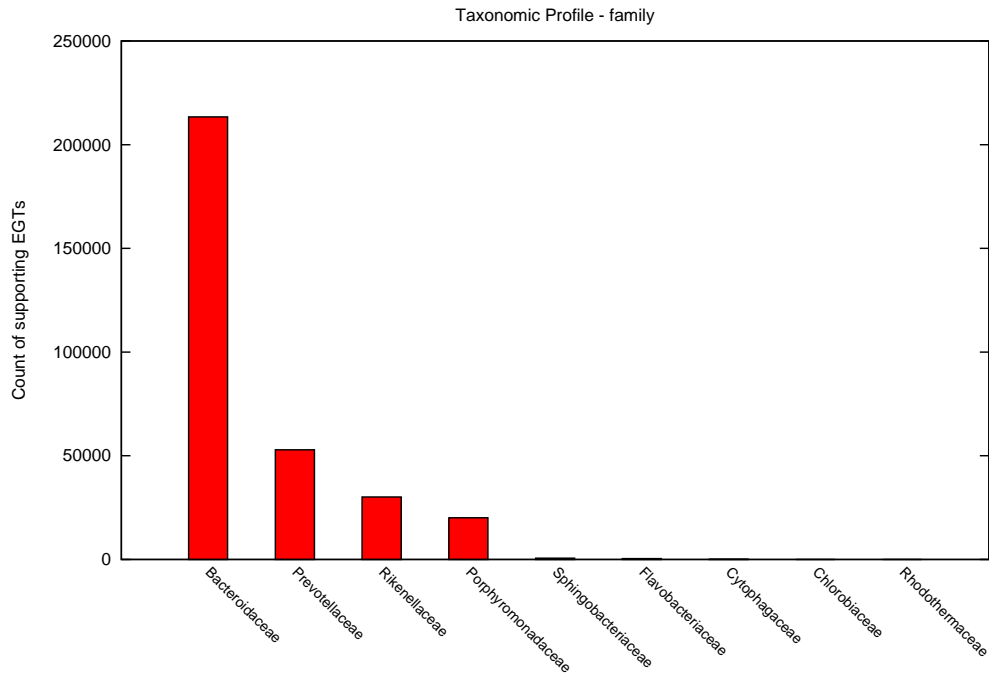

Supplementary Figure 24: All families from the phylum *Bacteroidetes* in the human gut microbial gene catalogue.

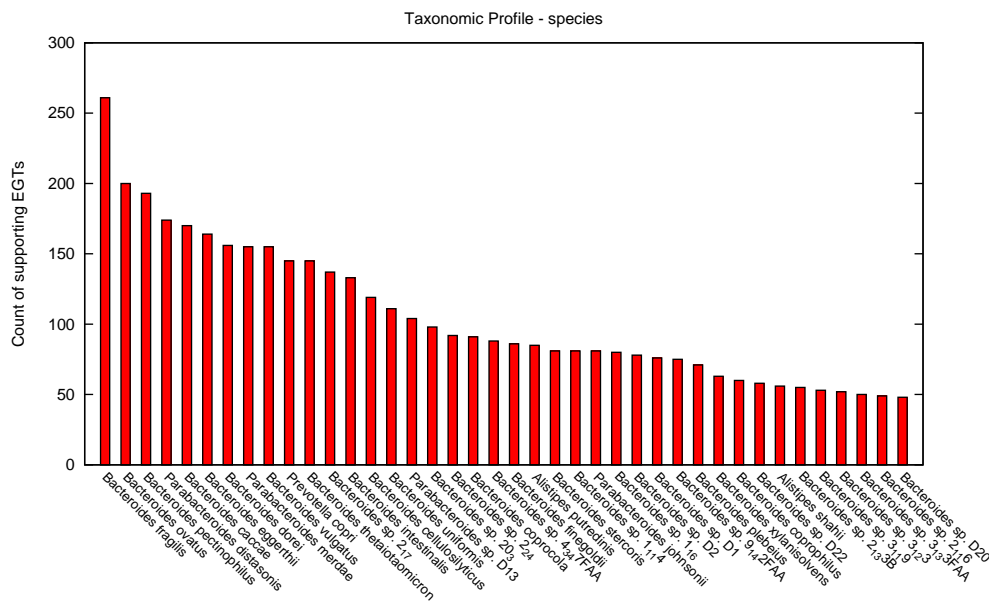

Supplementary Figure 25: The 40 most abundant species from the phylum *Bacteroidetes* in the human gut microbial gene catalogue.
